# Supplementary material for: Discontinuation of statin therapy in older people: does a cancer diagnosis make a difference? An observational cohort study using data linkage
Source: PubMed Central journal article supplement — BMJ Open. 2012 May 21;2(3):e000880. doi: 10.1136/bmjopen-2012-000880 (PMC3358623; doi:10.1136/bmjopen-2012-000880), 2012-05-21
Supplement: bmjopen-2012-000880.draft_revisions.pdf [file bmjopen-2012-000880.draft_revisions.pdf]

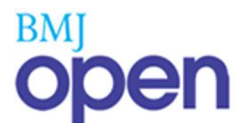

**Discontinuation of statin therapy in the elderly – does a cancer diagnosis make a difference? An observational cohort study using data linkage.**

|                                 |                                                                                                                                                                                                                                                                        |
|---------------------------------|------------------------------------------------------------------------------------------------------------------------------------------------------------------------------------------------------------------------------------------------------------------------|
| Journal:                        | <i>BMJ Open</i>                                                                                                                                                                                                                                                        |
| Manuscript ID:                  | bmjopen-2012-000880                                                                                                                                                                                                                                                    |
| Article Type:                   | Research                                                                                                                                                                                                                                                               |
| Date Submitted by the Author:   | 15-Jan-2012                                                                                                                                                                                                                                                            |
| Complete List of Authors:       | Stavrou, Efty; Adult Cancer Program, Lowy cancer Research Centre<br>Buckley, Nicholas; Prince of Wales Clinical School,<br>Olivier, Jake; Adult Cancer Program, Lowy cancer Research Centre<br>Pearson, Sallie-Anne; Adult Cancer Program, Lowy Cancer Research Centre |
| <b>Primary Subject Heading</b>: | Medical management                                                                                                                                                                                                                                                     |
| Secondary Subject Heading:      | Oncology                                                                                                                                                                                                                                                               |
| Keywords:                       | Adult oncology < ONCOLOGY, Medical futility, Statins                                                                                                                                                                                                                   |
|                                 |                                                                                                                                                                                                                                                                        |

SCHOLARONE™  
Manuscripts

1  
2  
3 Discontinuation of statin therapy in the elderly – does a cancer diagnosis make a difference?  
4 An observational cohort study using data linkage.  
5

6 **Authors:** Efty Stavrou<sup>1</sup>, Nicholas Buckley<sup>2</sup>, Jake Olivier<sup>1</sup>, Sallie-Anne Pearson<sup>1</sup>  
7  
8

9  
10 <sup>1</sup> Adult Cancer Program, Prince of Wales Clinical School, Lowy Cancer Research Centre,  
11 University of New South Wales, Sydney, Australia  
12

13  
14 <sup>2</sup> Prince of Wales Clinical School, University of New South Wales, Sydney, Australia  
15

16  
17 **Corresponding Author:**

18 Dr Sallie-Anne Pearson  
19 Level 15, Mathews Building  
20 University of New South Wales  
21 Sydney NSW 2052  
22 t: +61-2- 9385 1227  
23 f: +61-2-9385 1430  
24 e: [sallie.pearson@unsw.edu.au](mailto:sallie.pearson@unsw.edu.au)  
25  
26  
27  
28

29 **Funding:** This study was funded by a Cancer Australia project grant (ID Number: 568773).  
30 Dr Pearson is funded as a Cancer Institute NSW Career Development Fellow (ID Number:  
31 09/CDF/2-37).  
32  
33

34  
35 **Acknowledgments:** This article has been reviewed by DVA prior to publication and the  
36 views expressed are not necessarily those of the Australian Government.  
37  
38

39  
40 **Abstract count:** 274

41 **Body word count:** 1617  
42  
43  
44  
45  
46  
47  
48  
49  
50  
51  
52  
53  
54  
55  
56  
57  
58  
59  
60

**ABSTRACT**

Objective: Our aim was to examine statin discontinuation rates in a cohort of elderly Australians with newly diagnosed cancer using population-based secondary health data.

Design: Observational cohort study

Setting: New South Wales, the largest jurisdiction in Australia. The Pharmaceutical Benefits and Repatriation Pharmaceutical Benefits Schemes are national programs subsidising prescription drugs to the Australian population and Australian Government Department of Veterans' Affairs clients.

Participants: Our cohort comprised of 1,731 cancer patients aged  $\geq 65$  years with evidence of statin use in the 90 days prior to diagnosis. They were matched to 3,462 non-cancer patients prescribed statins in the same period.

Main outcome measure: We compared statin discontinuation rates up to four years post-diagnosis and examined the factors associated with statin discontinuation.

Results: Discontinuation rates were comparable in the cancer and comparison cohorts at four years (27%); however, the cancer cohort discontinued statins at a significantly higher rate than the comparison cohort at three, six and 12 months of follow-up (9.7% vs. 7.4% at 12 months, respectively). More than 20% of the cancer cohort with distant disease spread at diagnosis and 35% with localized spread at diagnosis were dispensed statins within 30 days of death. Cancer patients with non-localised disease at diagnosis ( $p < 0.001$ ), older age ( $p = 0.006$ ), upper gastro-intestinal organs and liver cancer (aHR 2.95, 95%CI 1.92-4.53) and cancer of the lung, bronchus and trachea (aHR 1.99, 95%CI 1.32-3.00) were more likely to discontinue statin therapy.

Conclusion: Cancer patients would benefit from a comprehensive reassessment of all drug treatments. The original therapeutic goals of primary and secondary prevention of other diseases may be largely futile in light of a limited prognosis and add unnecessarily to therapeutic burden.

1  
2  
3 **Article Summary:**  
4

5  
6 Article Focus:  
7

- 8
- 9 • There is limited clinical guidance on managing comorbid conditions after the  
10 diagnosis of life-threatening illness
  - 11 • Some medications may be continued unnecessarily and may even cause harm after a  
12 cancer diagnosis
  - 13 • The aim of this study is to examine the rates of statin discontinuation in a cohort of  
14 older cancer patients compared with their peers with no cancer diagnosis.  
15  
16  
17  
18

19  
20 Key Messages:  
21

- 22
- 23 • In the setting of cancer, statins may be continued unnecessarily
  - 24 • A high proportion of cancer patients are dispensed statins 30 days before death
  - 25 • Cancer drug treatment add to therapeutic burden so there is a strong imperative to  
26 review and reassess existing treatments in these patients  
27  
28  
29

30 Strengths and Limitations:  
31

- 32
- 33 • This is a large retrospective cohort study of elderly Australians using population  
34 dataset linkage
  - 35 • We were unable to establish if statin therapy had been reviewed subsequent to a  
36 cancer diagnosis nor the reasons for discontinuation  
37  
38  
39  
40  
41  
42  
43  
44  
45  
46  
47  
48  
49  
50  
51  
52  
53  
54  
55  
56  
57  
58  
59  
60

## INTRODUCTION

There has been much debate about the clinical and economic benefits of prescribing preventive medicines for patients with life-limiting illness.<sup>1-3</sup> In the area of cancer, there has been a particular focus on 'futile' drug use in the setting of advanced disease where median survival is relatively short and there is little to no evidence demonstrating the benefits of drug treatments during anticipated survival times.<sup>2, 4-6</sup> Consequently there have been calls from the medical community to review and reduce the therapeutic burden on patients with life-threatening disease.<sup>4-7</sup>

Despite the large body of evidence guiding clinicians to initiate medications for the management of comorbid conditions, there has been limited guidance on reducing or ceasing medications at the end of life. Further, there is a scarcity of studies examining the management of comorbid conditions after the diagnosis of life threatening illness. However, there is some evidence to suggest that medications used for the secondary prevention of comorbid disease are continued longer than clinically indicated.<sup>1, 5, 8, 9</sup>

Statins are among the most commonly prescribed medications in the developing world. Their benefit in reducing cardiovascular events and mortality after an acute coronary syndrome, as well as the reduction in risk of major cardiovascular events in people without established cardiovascular disease is well documented.<sup>10-13</sup> However, many questions remain about the use of these medicines with advancing age. In particular, competing risks from cancer and other comorbid conditions, drug interactions due to high levels of polypharmacy and tolerability are likely to alter the benefit/risk ratios in older patients.<sup>14-16</sup>

The aim of this study is to examine statin discontinuation rates in a cohort of elderly cancer patients. Specifically, we compare discontinuation rates to a matched cohort of non-cancer patients and by cancer stage at diagnosis. Finally, we assess the predictors of statin discontinuation in both cohorts.

## METHODS

*Setting:* The Pharmaceutical Benefits and Repatriation Pharmaceutical Benefits Schemes (PBS and RPBS) are national programs subsidising prescription drugs to the Australian population and Australian Government Department of Veterans' Affairs (DVA) clients. The RPBS comprises all PBS items plus additional items available only to DVA clients.<sup>17, 18</sup>

*Data sources and Linkage:* We used the following data sets to undertake our study:

- i) DVA client file (1994 - 2007): information on sex, dates of birth and death, and veteran entitlement level of DVA clients residing in New South Wales (NSW), the largest Australian state.
- ii) RPBS (July 2004 to June 2009): all dispensed pharmaceutical items (RPBS item code, name and strength, date of supply, quantity supplied and entitlement at time of dispensing).
- iii) NSW Central Cancer Registry (CCR) (1994-2007): mandatory notifications of invasive cancer in NSW. We used International Classification of Diseases for Oncology, Third edition (ICD-O-3)<sup>19</sup> codes to identify cancer types.
- iv) Admitted Patient Data Collection (APDC) (July 2000 - June 2009): all public, private and repatriation hospital separations in NSW.

Data linkage was undertaken by the NSW Centre for Health Record Linkage using best practice privacy preserving protocols. The study was approved by the NSW Population and Health Services and Department of Veterans' Affairs Human Research Ethics Committees (Approval Numbers: 2008/02/060 and E008/003) and did not require consent from individuals.

*Cancer Cohort (n=1,731):* Comprised fully-entitled clients aged  $\geq 65$  years, with a primary invasive cancer notification between 2005 and 2007, alive for  $\geq$  six months post-diagnosis and with at least two statin dispensing records (ATC codes C10AA, C10BA, C10BX) in the 90 days prior to their diagnosis date (at least one within 60 days). We used the statin dispensing date immediately prior to diagnosis date as the index date for follow-up.

1  
2  
3 *Comparison Cohort (n=3,462)*: We matched (using random selection without replacement) two  
4 clients with no evidence of a cancer notification to every cancer cohort member on year of  
5 birth (within five years), gender, a statin dispensing record within 15 days of the index date  
6 and first statin dispensing date (within 15 days) to match patients with comparable duration  
7 of statin treatment). Cohort members also were alive for at least six months after the index  
8 date.  
9

10  
11  
12  
13  
14 *Statistical Analyses*: Differences between the characteristics of the cohorts were examined  
15 using  $\chi^2$  (Likelihood ratio) test. Our follow-up period commenced 60 days after the index  
16 date until December 31, 2009. We defined the discontinuation date as the date of last  
17 dispensing plus 30 days. We did not consider patients to have discontinued therapy if this  
18 date was within six months of the end of follow-up or in the three months before death. We  
19 calculated discontinuation rates at various time-points using Kaplan-Meier product limit  
20 estimates. Censor dates were the date of last statin dispensing before discontinuation,  
21 December 31, 2009 or death date.  
22  
23  
24  
25  
26  
27  
28

29  
30 We used Cox Proportional hazard regression to determine the factors associated with  
31 discontinuation following a cancer diagnosis adjusting for year of birth, spread-of-disease,  
32 cancer topography, hospitalisations prior to diagnosis, comorbidity burden and median  
33 statin daily quantity prior to diagnosis. We calculated the median daily quantity as [Tablet  
34 Strength  $\times$  Quantity dispensed]/WHO Defined Daily Dose (DDD)<sup>20</sup>/days supplied] and  
35 comorbidity using the RxRisk Index using counts of up to 42 general drug categories (not  
36 including cancer drug categories) using pharmacy claims data within six months prior to a  
37 patient's cancer diagnosis.<sup>21, 22</sup> We omitted gender from this model as some cancers are  
38 gender-specific. However, gender did not show a statistically significant bivariate  
39 association with discontinuation. We also used Cox regression to examine the predictors of  
40 discontinuation in the comparison group, with age, gender, comorbidity burden,  
41 hospitalisations and median daily quantity as covariates. Statistical significance was  
42 assessed at the  $p < 0.05$  (two-tailed) level.  
43  
44  
45  
46  
47  
48  
49  
50  
51  
52  
53  
54  
55  
56  
57  
58  
59  
60

## RESULTS

*Cohort Characteristics:* Approximately two-thirds of the cancer and comparison cohorts were aged  $\geq 75$  years on January 1 2005 and 72% were male. The most common cancer diagnoses were prostate (23%), colorectal cancer (17%) and melanoma of the skin (14%). Most cancer patients were diagnosed with localised (46%) or unknown spread (32%). The cancer cohort had fewer hospital admissions in the year prior to the index date than the comparison cohort (92% of the cancer cohort with  $\leq 4$  separations; 84% in the comparison cohort; Likelihood ratio  $\chi^2=85.6$ ,  $p<0.0001$ ). Comorbidity burden was similar in both cohorts with 78% having four to nine comorbidities prior to the index date.

*Statin Use Prior to the Index Date:* More than 90% of both cohorts were prescribed atorvastatin, simvastatin or pravastatin alone. The median daily quantity prior to the index date was  $\geq 1$ DDD per day for atorvastatin, pravastatin and rovastatin. The median time between the first statin dispensing to the index date was approximately 600 days for both cohorts, with 18% of the cancer cohort and 26% of the comparison group having at least one period of  $\geq 90$  days between dispensing records; median duration of breaks in therapy were 136 days and 142 days in the cancer and comparison cohorts respectively. (Table 1)

*Statin Discontinuation:* Median follow-up time was 913 and 958 days for the cancer and comparison cohorts respectively (IQR 464-1297 days and 496-1289 days). We found no significant differences in the discontinuation estimates of the cancer and comparison cohorts after four years [cancer 26.5% (95%CI 24.1-29.2%); comparison 27.2% (95%CI 25.3-29.1%)]. The cancer cohort had significantly higher discontinuation rates at 3, 6 and 12 months; however, after this, rates were comparable with the comparison cohort (Figure 1). More than 31% of the cancer cohort had a statin dispensed within 30 days of their death (Figure 2) and this was the case for 21% of those with metastatic disease and 35% with localized spread at diagnosis.

*Predictors of Statin Discontinuation:* Older patients and those diagnosed with non-localised disease had shorter time to statin discontinuation as did patients with upper GI and liver cancer and cancer of the lung, bronchus and trachea. Patients with melanoma of the skin had



1  
2  
3 longer times to discontinuation (Table 2). Older clients in the comparison cohort also had  
4 shorter time to discontinuation than their younger counterparts ( $p=0.001$ ).  
5  
6

## 7 DISCUSSION

8  
9 This retrospective cohort study of elderly Australians highlights a need for comprehensive  
10 and ongoing review of medications after the diagnosis of life limiting illness. Our findings  
11 demonstrate that in the setting of cancer, statins may be continued unnecessarily. To  
12 complement the existing literature, which has focused on statin discontinuation in the six  
13 months prior to death, we examined rates of statin discontinuation subsequent to a cancer  
14 diagnosis and found rates of discontinuation are relatively low in the first 12 months after a  
15 diagnosis but are higher than in non-cancer patients. Beyond 12 months post-diagnosis  
16 discontinuation rates are no different to rates in the non-cancer population. We also found  
17 higher rates of discontinuation in patients diagnosed with metastatic disease. These findings  
18 may indicate some recognition on the part of doctors and or patients that medications need  
19 to be rationalized in light of a limited prognosis. Nevertheless, a large proportion of cancer  
20 patients were prescribed statins in the 30 days before death.  
21  
22  
23  
24  
25  
26  
27  
28  
29  
30

31  
32 Our findings are consistent with previous research from North America and Australia, all of  
33 which highlight the missed opportunities to reduce the therapeutic burden of many patients  
34 after a life limiting diagnosis.<sup>4-7</sup> If the potential benefits of therapy are incremental and long-  
35 term then there are strong imperatives for review when cancer therapies are commenced as  
36 it is well established that the risks of adverse outcomes increases exponentially with the total  
37 number of medications (the “therapeutic burden”).<sup>23</sup> Our study is limited in that we are  
38 unable to establish the reasons for discontinuation in our cohort. However, improved  
39 communication among physicians and patients is likely to increase the understanding about  
40 the original therapeutic goals of particular treatments. Further, more systematic guidance on  
41 ceasing medications at the end of life would reduce therapeutic burden for individual  
42 patients and have the added benefit of reducing costs placed on already stretched health  
43 care budgets.  
44  
45  
46  
47  
48  
49  
50  
51  
52  
53  
54  
55  
56  
57  
58  
59  
60

Contributors:

Efty Stavrou (research fellow cancer epidemiology, University of New South Wales (UNSW)); Nicholas Buckley (professor of medicine, UNSW); Jake Olivier (senior biostatistician, UNSW); Sallie-Anne Pearson (senior research fellow pharmacoepidemiology, UNSW). EPS performed the statistical analyses and drafted the manuscript; JO guided the statistical analyses; NB and SAP designed the study and drafted the manuscript. All authors read and approved the final manuscript. SAP is guarantor.

Competing Interest Statement:

All authors have completed the Unified Competing Interest form at [www.icmje.org/coi\\_disclosure.pdf](http://www.icmje.org/coi_disclosure.pdf) (available on request from the corresponding author) and declare no support from any organisation for the submitted work; no financial relationships with any organisations that might have an interest in the submitted work in the previous three years; no other relationships or activities that could appear to have influenced the submitted work.

The funders had no role in the study design, data collection, data analysis, data interpretation, or writing of the report. The views expressed are not necessarily those of the funders.

All authors had full access to all of the data (including statistical reports and tables) in the study and can take responsibility for the integrity of the data and the accuracy of the data analysis.

Data sharing: no additional data available.

Table 1: Statin use prior to (and including) index date of cancer and comparison cohorts

| Variable                                                            | Cancer Cohort |           | Comparison Cohort |           |
|---------------------------------------------------------------------|---------------|-----------|-------------------|-----------|
|                                                                     | N=1,731       |           | N=3,462           |           |
| <b>Statin type</b>                                                  | n             | %         | n                 | %         |
| Atorvastatin alone                                                  | 685           | 39.6      | 1,304             | 37.8      |
| Fluvastatin alone                                                   | 13            | 0.8       | 39                | 1.1       |
| Pravastatin alone                                                   | 257           | 14.8      | 525               | 15.2      |
| Rosuvastatin alone                                                  | 1             | 0.0       | 3                 | 0.0       |
| Simvastatin alone                                                   | 653           | 37.7      | 1,306             | 37.8      |
| Two or more statins                                                 | 122           | 7.0       | 285               | 8.2       |
| <b>DDD/day</b>                                                      | Median        | IQR       | Median            | IQR       |
| Atorvastatin                                                        | 1.00          | 1.0-2.00  | 1.00              | 1.00-2.00 |
| Fluvastatin                                                         | 0.67          | 0.33-0.67 | 0.67              | 0.33-0.67 |
| Pravastatin Sodium                                                  | 1.33          | 0.67-1.33 | 1.33              | 0.67-1.33 |
| Rosuvastatin                                                        | 2.00          | 1.00-2.00 | 2.00              | 1.00-2.31 |
| Simvastatin                                                         | 0.67          | 0.67-1.33 | 0.67              | 0.67-1.33 |
| <b>Time from first statin to index date (days)</b>                  | Median        | IQR       | Median            | IQR       |
|                                                                     | 611           | 336-901   | 616               | 339-903   |
| <b>Patients with breaks of <math>\geq 90</math> days in therapy</b> | n             | %         | n                 | %         |
|                                                                     | 310           | 17.9      | 888               | 25.6      |
| <b>Duration of breaks in therapy (days)</b>                         | Median        | IQR       | Median            | IQR       |
|                                                                     | 136           | 102-211   | 142               | 104-232   |

Table 2: Adjusted Cox-Proportional Hazard Regression analyses for association with statin discontinuation during follow-up

| Variable                        | Cases<br>N | Discontinued<br>n (%) | aHR*  | 95% CI    | p-value  |
|---------------------------------|------------|-----------------------|-------|-----------|----------|
| <b>Age (at 1 Jan 2005)</b>      |            |                       | 0.85† | 0.76-0.95 | 0.004    |
| ≤74 years                       | 247        | 35 (14.2)             |       |           |          |
| 75-79 years                     | 289        | 53 (18.3)             |       |           |          |
| 80-84 years                     | 832        | 121 (14.5)            |       |           |          |
| 85+ years                       | 363        | 81 (22.3)             |       |           |          |
| <b>Prior hospital admission</b> |            |                       | 1.01† | 0.99-1.03 | 0.16     |
| 0                               | 764        | 121 (15.8)            |       |           |          |
| 1-4                             | 833        | 148 (17.8)            |       |           |          |
| 5-9                             | 85         | 15 (17.6)             |       |           |          |
| 10+                             | 49         | 6 (12.2)              |       |           |          |
| <b>Comorbidity burden</b>       |            |                       | 0.99† | 0.96-1.03 | 0.36     |
| 0-3                             | 261        | 46 (17.6)             |       |           |          |
| 4-9                             | 120        | 19 (15.8)             |       |           |          |
| 10+                             | 1,350      | 225 (16.7)            |       |           |          |
| <b>Median DDD/day</b>           |            |                       | 1.14† | 0.99-1.30 | 0.06     |
| <b>Degree of Spread</b>         |            |                       |       |           | <0.001   |
| Localised                       | 789        | 106 (13.4)            | 1.00  | 1.00      | Referent |
| Regional                        | 275        | 54 (19.6)             | 1.73  | 1.28-2.35 | <0.001   |
| Distant                         | 120        | 30 (25.0)             | 3.90  | 2.72-5.59 | <0.001   |
| Unknown                         | 547        | 100 (18.3)            | 1.36  | 1.03-1.80 | 0.03     |
| <b>Cancer Topography</b>        |            |                       |       |           |          |
| Upper GI, Liver                 | 69         | 32 (46.4)             | 2.95  | 1.92-4.53 | <0.001   |
| Lung, Bronchus, Trachea         | 120        | 38 (31.7)             | 1.99  | 1.32-3.00 | 0.001    |
| Lymphoma                        | 73         | 19 (26.0)             | 1.24  | 0.71-2.16 | 0.46     |
| Other type                      | 207        | 53 (25.1)             | 1.28  | 0.87-1.89 | 0.20     |
| Colorectal                      | 300        | 70 (23.3)             | 1.00  | 1.00      | Referent |
| Bladder                         | 65         | 14 (21.5)             | 1.19  | 0.66-2.13 | 0.56     |
| Kidney                          | 38         | 8 (21.1)              | 0.87  | 0.41-1.81 | 0.70     |
| Breast                          | 102        | 21 (20.6)             | 0.98  | 0.60-1.60 | 0.93     |
| Head & Neck                     | 44         | 9(20.4)               | 1.01  | 0.50-2.03 | 0.98     |
| Leukaemia                       | 35         | 7 (20.0)              | 1.08  | 0.48-2.45 | 0.85     |
| Ill-defined, unspecified        | 42         | 8 (19.0)              | 0.51  | 0.24-1.09 | 0.08     |
| Prostate                        | 393        | 68 (17.3)             | 0.79  | 0.55-1.14 | 0.20     |
| Melanoma of the skin            | 243        | 30 (12.4)             | 0.58  | 0.37-0.91 | 0.02     |

\*Adjusted for all factors in the table. † aHR indicates ratio per decade, admission, comorbid illness and DDD respectively.

Figure 1: Statin discontinuation after index date as determined with Kaplein-Meier product limit estimates

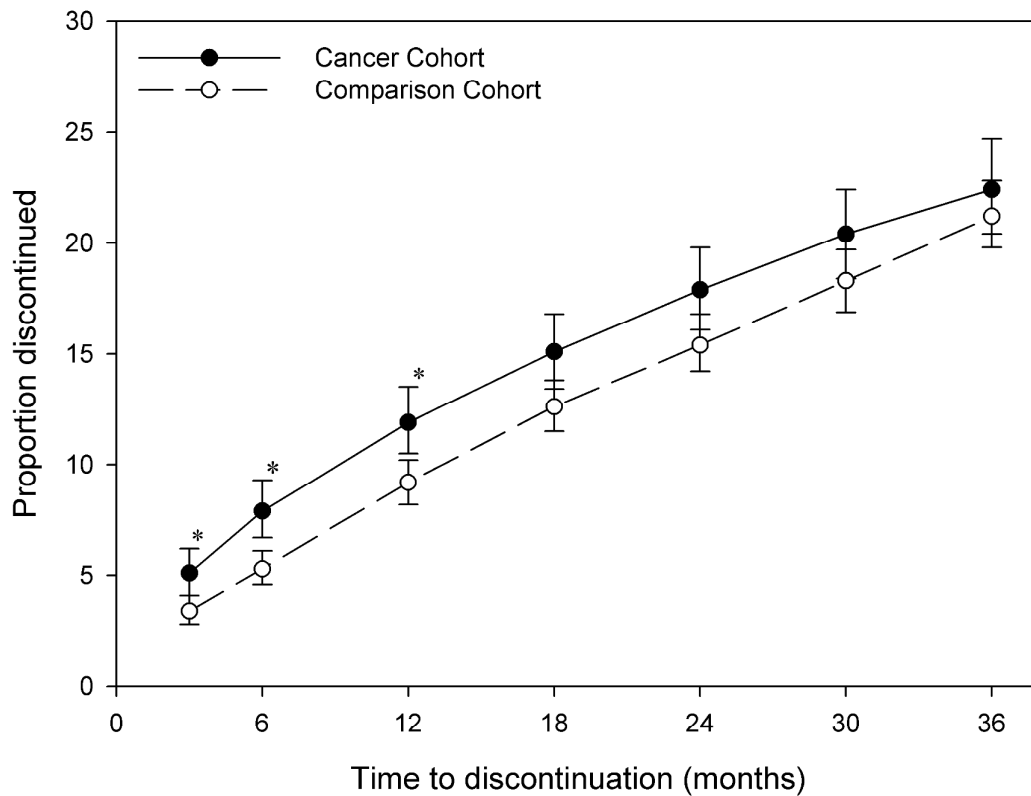

1  
2  
3  
4  
5  
6  
7  
8  
9  
10  
11  
12  
13  
14  
15  
16  
17  
18  
19  
20  
21  
22  
23  
24  
25  
26  
27  
28  
29  
30  
31  
32  
33  
34  
35  
36  
37  
38  
39  
40  
41  
42  
43  
44  
45  
46  
47  
48  
49  
50  
51  
52  
53  
54  
55  
56  
57  
58  
59  
60

Figure 2: Scatter plot of time to last statin prescription against time to death from diagnosis date.

Shaded area indicates the period within 30days of death.

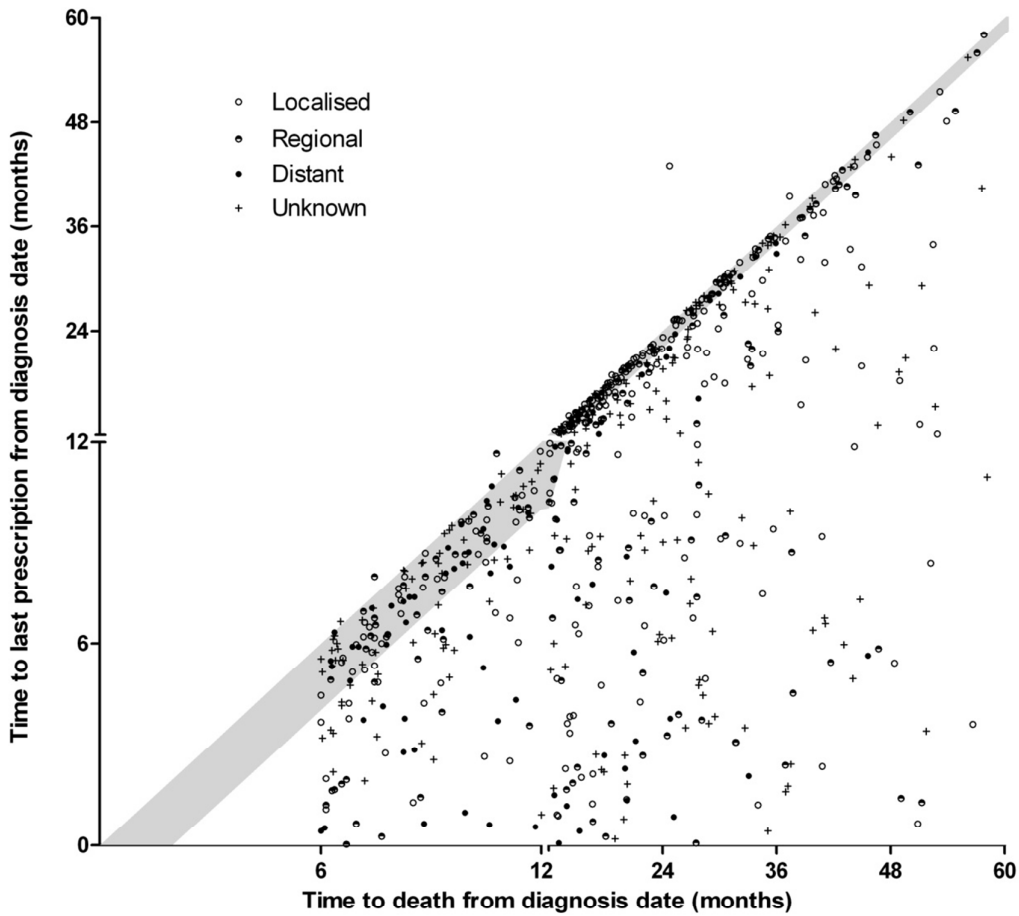

## References

1. Hall P, Lord S, El-Laboudi A, Seymour MT. Non-cancer medications for patients with incurable cancer: time to stop and think. *Br J Gen Pract.* 2010; doi:10.3399/brgp10X483887.
2. Tanvetyanon T, Choudhury A. Physician practice in the discontinuation of statins among patients with advanced lung cancer. *J Palliat Care.* 2006; **22**: 281-5.
3. Stevenson JP, Currow D, Abernathy A, Tanvetyanon T. The broader implications of managing statins at the end of life (Comment). *J Palliat Care.* 2007; **23**: 188-9.
4. Riechelmann R, Krzyzanowska MK, Zimmermann C. Futile medication use in terminally ill cancer patients. *Support Care Cancer.* 2009; **17**: 745-8.
5. Fede A, Miranda M, Antonangelo D, Trevizan L, Schaffhausser H, Hamermesz B, et al. Use of unnecessary medications by patients with advanced cancer: cross-sectional survey. *Support Care Cancer.* 2010; DOI 10.1007/s00520-010-0947-1.
6. Silveira M, Segnini Kazanis A, Shevrin M. Statins in the last six months of life: A recognizable, life-limiting condition does not decrease their use. *J Palliat Med.* 2008; **11**: 685-93.
7. Vollrath A, Sinclair C, Hallenbeck J. Discontinuing cardiovascular medications at the end of life: Lipidlowering agents. *J Palliat Med.* 2005; **8**: 876-81.
8. Abernathy A, Aziz N, Basch E, Bull J, Cleeland C, Currow D, et al. A strategy to advance the evidence base in palliative medicine: Formation of a palliative care research cooperative group. *J Palliat Med.* 2010; **13**: 1407-13.
9. Davis G. Discontinuing lipid-lowering agents. *J Palliat Med.* 2006; **9**: 619.
10. Amarenco P, Labreuche J, Lavalley P, Touboul P. Statins in stroke prevention and carotid atherosclerosis: Systematic review and up-to-date meta-analysis. *Stroke.* 2002; **35**: 2902-9.
11. Sever P, Dahlof B, Poulter N, et al. Prevention of coronary and stroke events with atorvastatin in hypertensive patients who have average or lower-than-average cholesterol concentrations, in the Anglo-Scandinavian Cardiac Outcomes Trial - Lipid Lowering Arm (ASCOT-LLA): A multicentre randomised controlled trial. *Lancet.* 2003; **361**: 1149-58.
12. Shepherd J, Blauw GJ, Murphy MB, Bollen EL, Buckley BM, Cobbe SM, et al. Pravastatin in elderly individuals at risk of vascular disease (PROSPER): a randomised controlled trial. *Lancet.* 2002; **360**: 1623-30.
13. Downs JR, Clearfield M, Weis S, Whitney E, Shapiro DR, Beere PA, et al. Primary prevention of acute coronary events with lovastatin in men and women with average cholesterol levels: Results of AFCAPS/TexCAPS. Air Force/Texas Coronary Atherosclerosis Prevention Study. *JAMA.* 1998; **279**: 1615-22.
14. Ballantyne C, Corsini A, Davidson M, Holdaas H, Jacobson T, Leitersdorf E, et al. Risk for myopathy with statin therapy in high-risk patients. *Arch Intern Med.* 2003; **163**: 553-64.
15. Corsini A, Bellosta S, Baetta R, Fumagalli R, Paoletti R, Bernini F. New insights into the pharmacodynamic and pharmacokinetic properties of statins. *Pharmacol Ther.* 1999; **84**: 413-28.
16. Newman C, Palmer G, Silbershatz H, Szarek M. Safety of atorvastatin derived from analysis of 44 completed trials in 9,416 patients. *Am J Cardiol.* 2003; **92**: 670-6.
17. Department of Veterans' Affairs (DVA). Annual Report 2006-2007. Canberra: DVA, ; 2007.
18. Department of Veterans' Affairs Rehabilitation RaDG. Treatment Population Statistics. Quarterly Report September 2007 Canberra: Department of Veretans' Affairs,; 2007.
19. Percy C, Van Holten V, Muir C, (eds). ICD-O International Classification of Diseases for Oncology, 3rd edition. . Geneva: WHO; 1990.
20. WHO Collaborating Centre for Drug Statistics Methodology. ATC/DDD Index: C10AA HMG CoA reductase inhibitors. 2011 [cited 23rd March 2011]; Available from: [http://www.whooc.no/atc\\_ddd\\_index/?code=C10AA](http://www.whooc.no/atc_ddd_index/?code=C10AA)
21. Lu CY, Barratt J, Vitry A, Roughead E. Charlson and Rx-risk comorbidity indices were predictive of mortality in the Australian health care setting. *J Clin Epidemiol.* 2011; **64**: 223-8.

1  
2  
3  
4  
5  
6  
7  
8  
9  
10  
11  
12  
13  
14  
15  
16  
17  
18  
19  
20  
21  
22  
23  
24  
25  
26  
27  
28  
29  
30  
31  
32  
33  
34  
35  
36  
37  
38  
39  
40  
41  
42  
43  
44  
45  
46  
47  
48  
49  
50  
51  
52  
53  
54  
55  
56  
57  
58  
59  
60

22. Vitry A, Wong SA, Roughead EE, Ramsay E, Barratt J. Validity of medication-based co-morbidity indices in the Australian elderly population. *Aust NZ J Public Health*. 2009; **33**: 126-30.

23. Maggiore RJ, Gross CP, Hurria A. Polypharmacy in older adults with cancer. *The Oncologist*. 2010; **15**: 507-22.

For peer review only



STROBE Statement—Checklist of items that should be included in reports of *cohort studies*

|                              | Item No | Recommendation                                                                                                                                                                                    |                    |
|------------------------------|---------|---------------------------------------------------------------------------------------------------------------------------------------------------------------------------------------------------|--------------------|
| <b>Title and abstract</b>    | 1       | (a) Indicate the study's design with a commonly used term in the title or the abstract                                                                                                            | p.2                |
|                              |         | (b) Provide in the abstract an informative and balanced summary of what was done and what was found                                                                                               | p.2                |
| <b>Introduction</b>          |         |                                                                                                                                                                                                   |                    |
| Background/rationale         | 2       | Explain the scientific background and rationale for the investigation being reported                                                                                                              | p.3                |
| Objectives                   | 3       | State specific objectives, including any prespecified hypotheses                                                                                                                                  | p.3                |
| <b>Methods</b>               |         |                                                                                                                                                                                                   |                    |
| Study design                 | 4       | Present key elements of study design early in the paper                                                                                                                                           | p.4                |
| Setting                      | 5       | Describe the setting, locations, and relevant dates, including periods of recruitment, exposure, follow-up, and data collection                                                                   | pp.4,5             |
| Participants                 | 6       | (a) Give the eligibility criteria, and the sources and methods of selection of participants. Describe methods of follow-up                                                                        | pp.4,5             |
|                              |         | (b) For matched studies, give matching criteria and number of exposed and unexposed                                                                                                               | pp 4,5             |
| Variables                    | 7       | Clearly define all outcomes, exposures, predictors, potential confounders, and effect modifiers. Give diagnostic criteria, if applicable                                                          | p.5                |
| Data sources/<br>measurement | 8*      | For each variable of interest, give sources of data and details of methods of assessment (measurement). Describe comparability of assessment methods if there is more than one group              | pp.4,5             |
| Bias                         | 9       | Describe any efforts to address potential sources of bias                                                                                                                                         | N/A                |
| Study size                   | 10      | Explain how the study size was arrived at                                                                                                                                                         | p. 4               |
| Quantitative variables       | 11      | Explain how quantitative variables were handled in the analyses. If applicable, describe which groupings were chosen and why                                                                      | p.5                |
| Statistical methods          | 12      | (a) Describe all statistical methods, including those used to control for confounding                                                                                                             | p.5                |
|                              |         | (b) Describe any methods used to examine subgroups and interactions                                                                                                                               | p.5                |
|                              |         | (c) Explain how missing data were addressed                                                                                                                                                       | n/a                |
|                              |         | (d) If applicable, explain how loss to follow-up was addressed                                                                                                                                    | n/a                |
|                              |         | (e) Describe any sensitivity analyses                                                                                                                                                             | n/a                |
| <b>Results</b>               |         |                                                                                                                                                                                                   |                    |
| Participants                 | 13*     | (a) Report numbers of individuals at each stage of study—eg numbers potentially eligible, examined for eligibility, confirmed eligible, included in the study, completing follow-up, and analysed | p.4,6,9            |
|                              |         | (b) Give reasons for non-participation at each stage                                                                                                                                              | n/a                |
|                              |         | (c) Consider use of a flow diagram                                                                                                                                                                | n/a                |
| Descriptive data             | 14*     | (a) Give characteristics of study participants (eg demographic, clinical, social) and information on exposures and potential confounders                                                          | p.6,9              |
|                              |         | (b) Indicate number of participants with missing data for each variable of interest                                                                                                               | n/a                |
|                              |         | (c) Summarise follow-up time (eg, average and total amount)                                                                                                                                       | p6                 |
| Outcome data                 | 15*     | Report numbers of outcome events or summary measures over time                                                                                                                                    | pp.6,9             |
| Main results                 | 16      | (a) Give unadjusted estimates and, if applicable, confounder-adjusted estimates and their precision (eg, 95% confidence interval). Make clear                                                     | pp.6, 9<br>Table 2 |

|                          |    |                                                                                                                                                                            |             |
|--------------------------|----|----------------------------------------------------------------------------------------------------------------------------------------------------------------------------|-------------|
|                          |    | which confounders were adjusted for and why they were included                                                                                                             | Fig 1, 2    |
|                          |    | (b) Report category boundaries when continuous variables were categorized                                                                                                  | p6, Table 2 |
|                          |    | (c) If relevant, consider translating estimates of relative risk into absolute risk for a meaningful time period                                                           | n/a         |
| Other analyses           | 17 | Report other analyses done—eg analyses of subgroups and interactions, and sensitivity analyses                                                                             | p.6         |
| <b>Discussion</b>        |    |                                                                                                                                                                            |             |
| Key results              | 18 | Summarise key results with reference to study objectives                                                                                                                   | pp.7        |
| Limitations              | 19 | Discuss limitations of the study, taking into account sources of potential bias or imprecision. Discuss both direction and magnitude of any potential bias                 | p.12        |
| Interpretation           | 20 | Give a cautious overall interpretation of results considering objectives, limitations, multiplicity of analyses, results from similar studies, and other relevant evidence | pp.7        |
| Generalisability         | 21 | Discuss the generalisability (external validity) of the study results                                                                                                      | p.7         |
| <b>Other information</b> |    |                                                                                                                                                                            |             |
| Funding                  | 22 | Give the source of funding and the role of the funders for the present study and, if applicable, for the original study on which the present article is based              | p.1         |

\*Give information separately for exposed and unexposed groups.

**Note:** An Explanation and Elaboration article discusses each checklist item and gives methodological background and published examples of transparent reporting. The STROBE checklist is best used in conjunction with this article (freely available on the Web sites of PLoS Medicine at <http://www.plosmedicine.org/>, Annals of Internal Medicine at <http://www.annals.org/>, and Epidemiology at <http://www.epidem.com/>). Information on the STROBE Initiative is available at <http://www.strobe-statement.org>.

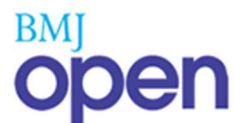

**Discontinuation of statin therapy in the elderly – does a cancer diagnosis make a difference? An observational cohort study using data linkage.**

|                                 |                                                                                                                                                                                                                                                                        |
|---------------------------------|------------------------------------------------------------------------------------------------------------------------------------------------------------------------------------------------------------------------------------------------------------------------|
| Journal:                        | <i>BMJ Open</i>                                                                                                                                                                                                                                                        |
| Manuscript ID:                  | bmjopen-2012-000880.R1                                                                                                                                                                                                                                                 |
| Article Type:                   | Research                                                                                                                                                                                                                                                               |
| Date Submitted by the Author:   | 29-Mar-2012                                                                                                                                                                                                                                                            |
| Complete List of Authors:       | Stavrou, Efty; Adult Cancer Program, Lowy cancer Research Centre<br>Buckley, Nicholas; Prince of Wales Clinical School,<br>Olivier, Jake; Adult Cancer Program, Lowy cancer Research Centre<br>Pearson, Sallie-Anne; Adult Cancer Program, Lowy Cancer Research Centre |
| <b>Primary Subject Heading</b>: | Medical management                                                                                                                                                                                                                                                     |
| Secondary Subject Heading:      | Oncology, Cardiovascular medicine, Pharmacology and therapeutics                                                                                                                                                                                                       |
| Keywords:                       | Adult oncology < ONCOLOGY, Medical futility, Statins                                                                                                                                                                                                                   |
|                                 |                                                                                                                                                                                                                                                                        |

SCHOLARONE™  
Manuscripts

1  
2  
3 Discontinuation of statin therapy in the elderly – does a cancer diagnosis make a difference?  
4 An observational cohort study using data linkage.  
5

6 **Authors:** Efty Stavrou<sup>1</sup>, Nicholas Buckley<sup>2</sup>, Jake Olivier<sup>1</sup>, Sallie-Anne Pearson<sup>1</sup>  
7  
8

9  
10 <sup>1</sup> Adult Cancer Program, Prince of Wales Clinical School, Lowy Cancer Research Centre,  
11 University of New South Wales, Sydney, Australia  
12

13  
14 <sup>2</sup> Prince of Wales Clinical School, University of New South Wales, Sydney, Australia  
15

16  
17 **Corresponding Author:**

18 Dr Sallie-Anne Pearson  
19 Level 15, Mathews Building  
20 University of New South Wales  
21 Sydney NSW 2052  
22 t: +61-2- 9385 1227  
23 f: +61-2-9385 1430  
24 e: [sallie.pearson@unsw.edu.au](mailto:sallie.pearson@unsw.edu.au)  
25  
26  
27  
28

29 **Funding:** This study was funded by a Cancer Australia project grant (ID Number: 568773).  
30 Dr Pearson is funded as a Cancer Institute NSW Career Development Fellow (ID Number:  
31 09/CDF/2-37).  
32  
33

34  
35 **Acknowledgments:** This article has been reviewed by DVA prior to publication and the  
36 views expressed are not necessarily those of the Australian Government.  
37  
38

39  
40 **Abstract count:** 274

41 **Body word count:** 1617  
42  
43  
44  
45  
46  
47  
48  
49  
50  
51  
52  
53  
54  
55  
56  
57  
58  
59  
60

**ABSTRACT**

Objective: Our aim was to examine statin discontinuation rates in a cohort of elderly Australians with newly diagnosed cancer using population-based secondary health data.

Design: Observational cohort study

Setting: New South Wales, the largest jurisdiction in Australia. The Pharmaceutical Benefits and Repatriation Pharmaceutical Benefits Schemes are national programs subsidising prescription drugs to the Australian population and Australian Government Department of Veterans' Affairs clients.

Participants: Our cohort comprised of 1,731 cancer patients aged  $\geq 65$  years with evidence of statin use in the 90 days prior to diagnosis. They were matched to 3,462 non-cancer patients prescribed statins in the same period.

Main outcome measure: We compared statin discontinuation rates up to four years post-diagnosis and examined the factors associated with statin discontinuation.

Results: Discontinuation rates were comparable in the cancer and comparison cohorts at four years (27%); however, the cancer cohort discontinued statins at a significantly higher rate than the comparison cohort at three, six and 12 months of follow-up (9.7% vs. 7.4% at 12 months, respectively). More than 20% of the cancer cohort with distant disease spread at diagnosis and 35% with localized spread at diagnosis were dispensed statins within 30 days of death. Cancer patients with non-localised disease at diagnosis ( $p < 0.001$ ), older age ( $p = 0.006$ ), upper gastro-intestinal organs and liver cancer (aHR 2.95, 95%CI 1.92-4.53) and cancer of the lung, bronchus and trachea (aHR 1.99, 95%CI 1.32-3.00) were more likely to discontinue statin therapy.

Conclusion: Cancer patients would benefit from a comprehensive reassessment of all drug treatments. The original therapeutic goals of primary and secondary prevention of other diseases may be largely futile in light of a limited prognosis and add unnecessarily to therapeutic burden.

1  
2  
3 **Article Summary:**  
4

5  
6 Article Focus:  
7

- 8
- 9 • There is limited clinical guidance on managing comorbid conditions after the  
10 diagnosis of life-threatening illness
  - 11 • Some medications may be continued unnecessarily and may even cause harm after a  
12 cancer diagnosis
  - 13 • The aim of this study is to examine the rates of statin discontinuation in a cohort of  
14 older cancer patients compared with their peers with no cancer diagnosis.  
15  
16  
17  
18

19  
20 Key Messages:  
21

- 22
- 23 • In the setting of cancer, statins may be continued unnecessarily
  - 24 • A high proportion of cancer patients are dispensed statins 30 days before death
  - 25 • Cancer drug treatment add to therapeutic burden so there is a strong imperative to  
26 review and reassess existing treatments in these patients  
27  
28  
29

30 Strengths and Limitations:  
31

- 32
- 33 • This is a large retrospective cohort study of elderly Australians using population  
34 dataset linkage
  - 35 • We were unable to establish if statin therapy had been reviewed subsequent to a  
36 cancer diagnosis nor the reasons for discontinuation  
37  
38  
39  
40  
41  
42  
43  
44  
45  
46  
47  
48  
49  
50  
51  
52  
53  
54  
55  
56  
57  
58  
59  
60

## INTRODUCTION

There has been much debate about the clinical and economic benefits of prescribing preventive medicines for patients with life-limiting illness.<sup>1-3</sup> In the area of cancer, there has been a particular focus on 'futile' drug use in the setting of advanced disease where median survival is relatively short and there is little to no evidence demonstrating the benefits of drug treatments during anticipated survival times.<sup>2, 4-6</sup> Consequently there have been calls from the medical community to review and reduce the therapeutic burden on patients with life-threatening disease.<sup>4-7</sup>

Despite the large body of evidence guiding clinicians to initiate medications for the management of comorbid conditions, there has been limited guidance on reducing or ceasing medications at the end of life. Further, there is a scarcity of studies examining the management of comorbid conditions after the diagnosis of life threatening illness. However, there is some evidence to suggest that medications used for the secondary prevention of comorbid disease are continued longer than clinically indicated.<sup>1, 5, 8, 9</sup>

Statins are among the most commonly prescribed medications in the developing world. Their benefit in reducing cardiovascular events and mortality after an acute coronary syndrome, as well as the reduction in risk of major cardiovascular events in people without established cardiovascular disease is well documented.<sup>10-13</sup> However, many questions remain about the use of these medicines with advancing age. In particular, competing risks from cancer and other comorbid conditions, drug interactions due to high levels of polypharmacy and tolerability are likely to alter the benefit/risk ratios in older patients.<sup>14-16</sup>

The aim of this study is to examine statin discontinuation rates in a cohort of elderly cancer patients. Specifically, we compare discontinuation rates to a matched cohort of non-cancer patients and by cancer stage at diagnosis. Finally, we assess the predictors of statin discontinuation in both cohorts.

## METHODS

*Setting:* The Pharmaceutical Benefits and Repatriation Pharmaceutical Benefits Schemes (PBS and RPBS) are national programs subsidising prescription drugs to the Australian population and Australian Government Department of Veterans' Affairs (DVA) clients. The RPBS comprises all PBS items plus additional items available only to DVA clients.<sup>17, 18</sup>

*Data sources and Linkage:* We used the following data sets to undertake our study:

- i) DVA client file (1994 - 2007): information on sex, dates of birth and death, and veteran entitlement level of DVA clients residing in New South Wales (NSW), the largest Australian state.
- ii) RPBS (July 2004 to June 2009): all dispensed pharmaceutical items (RPBS item code, name and strength, date of supply, quantity supplied and entitlement at time of dispensing).
- iii) NSW Central Cancer Registry (CCR) (1994-2007): mandatory notifications of invasive cancer in NSW. We used International Classification of Diseases for Oncology, Third edition (ICD-O-3)<sup>19</sup> codes to identify cancer types.
- iv) Admitted Patient Data Collection (APDC) (July 2000 - June 2009): all public, private and repatriation hospital separations in NSW.

Data linkage was undertaken by the NSW Centre for Health Record Linkage using best practice privacy preserving protocols. The study was approved by the NSW Population and Health Services and Department of Veterans' Affairs Human Research Ethics Committees (Approval Numbers: 2008/02/060 and E008/003) and did not require consent from individuals.

*Cancer Cohort (n=1,731):* Comprised fully-entitled clients aged  $\geq 65$  years, with a primary invasive cancer notification between 2005 and 2007, alive for  $\geq$  six months post-diagnosis and with at least two statin dispensing records (ATC codes C10AA, C10BA, C10BX) in the 90 days prior to their diagnosis date (at least one within 60 days). We used the statin dispensing date immediately prior to diagnosis date as the index date for follow-up.



1  
2  
3 *Comparison Cohort (n=3,462):* We matched (using random selection without replacement) two  
4 clients with no evidence of a cancer notification to every cancer cohort member on year of  
5 birth (within five years), gender, a statin dispensing record within 15 days of the index date  
6 and first statin dispensing date (within 15 days) to match patients with comparable duration  
7 of statin treatment). Cohort members also were alive for at least six months after the index  
8 date.  
9

10  
11  
12  
13  
14 *Statistical Analyses:* Differences between the characteristics of the cohorts were examined  
15 using  $\chi^2$  (Likelihood ratio) test. Our follow-up period commenced 60 days after the index  
16 date until December 31, 2009. We defined the discontinuation date as the date of last  
17 dispensing plus 30 days. We did not consider patients to have discontinued therapy if this  
18 date was within six months of the end of follow-up or in the three months before death. We  
19 calculated discontinuation rates at various time-points using Kaplan-Meier product limit  
20 estimates. Censor dates were the date of last statin dispensing before discontinuation,  
21 December 31, 2009 or death date.  
22  
23  
24  
25  
26  
27  
28

29  
30 We used Cox Proportional hazard regression to determine the factors associated with  
31 discontinuation following a cancer diagnosis adjusting for year of birth, spread-of-disease,  
32 cancer topography, hospitalisations prior to diagnosis, comorbidity burden and median  
33 statin daily quantity prior to diagnosis. We calculated the median daily quantity as [Tablet  
34 Strength  $\times$  Quantity dispensed]/WHO Defined Daily Dose (DDD)<sup>20</sup>/days supplied] and  
35 comorbidity using the RxRisk Index using counts of up to 42 general drug categories (not  
36 including cancer drug categories) using pharmacy claims data within six months prior to a  
37 patient's cancer diagnosis.<sup>21, 22</sup> We omitted gender from this model as some cancers are  
38 gender-specific. However, gender did not show a statistically significant bivariate  
39 association with discontinuation. We also used Cox regression to examine the predictors of  
40 discontinuation in the comparison group, with age, gender, comorbidity burden,  
41 hospitalisations and median daily quantity as covariates. Statistical significance was  
42 assessed at the  $p < 0.05$  (two-tailed) level.  
43  
44  
45  
46  
47  
48  
49  
50  
51  
52  
53  
54  
55  
56  
57  
58  
59  
60

## RESULTS

*Cohort Characteristics:* Approximately two-thirds of the cancer and comparison cohorts were aged  $\geq 75$  years on January 1 2005 and 72% were male. The most common cancer diagnoses were prostate (23%), colorectal cancer (17%) and melanoma of the skin (14%). Most cancer patients were diagnosed with localised (46%) or unknown spread (32%). The cancer cohort had fewer hospital admissions in the year prior to the index date than the comparison cohort (92% of the cancer cohort with  $\leq 4$  separations; 84% in the comparison cohort; Likelihood ratio  $\chi^2=85.6$ ,  $p<0.0001$ ). Comorbidity burden was similar in both cohorts with 78% having four to nine comorbidities prior to the index date.

*Statin Use Prior to the Index Date:* More than 90% of both cohorts were prescribed atorvastatin, simvastatin or pravastatin alone. The median daily quantity prior to the index date was  $\geq 1$ DDD per day for atorvastatin, pravastatin and rovastatin. The median time between the first statin dispensing to the index date was approximately 600 days for both cohorts, with 18% of the cancer cohort and 26% of the comparison group having at least one period of  $\geq 90$  days between dispensing records; median duration of breaks in therapy were 136 days and 142 days in the cancer and comparison cohorts respectively. (Table 1)

*Statin Discontinuation:* Median follow-up time was 913 and 958 days for the cancer and comparison cohorts respectively (IQR 464-1297 days and 496-1289 days). We found no significant differences in the discontinuation estimates of the cancer and comparison cohorts after four years [cancer 26.5% (95%CI 24.1-29.2%); comparison 27.2% (95%CI 25.3-29.1%)]. The cancer cohort had significantly higher discontinuation rates at 3, 6 and 12 months; however, after this, rates were comparable with the comparison cohort (Figure 1). More than 31% of the cancer cohort had a statin dispensed within 30 days of their death (Figure 2) and this was the case for 21% of those with metastatic disease and 35% with localized spread at diagnosis.

*Predictors of Statin Discontinuation:* Older patients and those diagnosed with non-localised disease had shorter time to statin discontinuation as did patients with upper GI and liver cancer and cancer of the lung, bronchus and trachea. Patients with melanoma of the skin had

1  
2  
3 longer times to discontinuation (Table 2). Older clients in the comparison cohort also had  
4 shorter time to discontinuation than their younger counterparts ( $p=0.001$ ).  
5  
6

## 7 8 **DISCUSSION**

9  
10 This retrospective cohort study of elderly Australians highlights a need for comprehensive  
11 and ongoing review of medications after the diagnosis of life limiting illness. Our findings  
12 demonstrate that in the setting of cancer, statins may be continued unnecessarily. To  
13 complement the existing literature, which has focused on statin discontinuation in the six  
14 months prior to death, we examined rates of statin discontinuation subsequent to a cancer  
15 diagnosis and found rates of discontinuation are relatively low in the first 12 months after a  
16 diagnosis but are higher than in non-cancer patients. Beyond 12 months post-diagnosis  
17 discontinuation rates are no different to rates in the non-cancer population. We also found  
18 higher rates of discontinuation in patients diagnosed with metastatic disease. These findings  
19 may indicate some recognition on the part of doctors and or patients that medications need  
20 to be rationalized in light of a limited prognosis. Nevertheless, a large proportion of cancer  
21 patients were prescribed statins in the 30 days before death.  
22  
23  
24  
25  
26  
27  
28  
29  
30  
31

32 Our findings are consistent with previous research from North America and Australia, all of  
33 which highlight the missed opportunities to reduce the therapeutic burden of many patients  
34 after a life limiting diagnosis.<sup>4-7</sup> If the potential benefits of therapy are incremental and long-  
35 term then there are strong imperatives for review when cancer therapies are commenced as  
36 it is well established that the risks of adverse outcomes increases exponentially with the total  
37 number of medications (the “therapeutic burden”).<sup>23</sup> Our study is limited in that we are  
38 unable to establish the reasons for discontinuation in our cohort. However, improved  
39 communication among physicians and patients is likely to increase the understanding about  
40 the original therapeutic goals of particular treatments. Further, more systematic guidance on  
41 ceasing medications at the end of life would reduce therapeutic burden for individual  
42 patients and have the added benefit of reducing costs placed on already stretched health  
43 care budgets.  
44  
45  
46  
47  
48  
49  
50  
51  
52  
53  
54  
55  
56  
57  
58  
59  
60

Contributors:

Efty Stavrou (research fellow cancer epidemiology, University of New South Wales (UNSW)); Nicholas Buckley (professor of medicine, UNSW); Jake Olivier (senior biostatistician, UNSW); Sallie-Anne Pearson (senior research fellow pharmacoepidemiology, UNSW). EPS performed the statistical analyses and drafted the manuscript; JO guided the statistical analyses; NB and SAP designed the study and drafted the manuscript. All authors read and approved the final manuscript. SAP is guarantor.

Competing Interest Statement:

All authors have completed the Unified Competing Interest form at [www.icmje.org/coi\\_disclosure.pdf](http://www.icmje.org/coi_disclosure.pdf) (available on request from the corresponding author) and declare no support from any organisation for the submitted work; no financial relationships with any organisations that might have an interest in the submitted work in the previous three years; no other relationships or activities that could appear to have influenced the submitted work.

The funders had no role in the study design, data collection, data analysis, data interpretation, or writing of the report. The views expressed are not necessarily those of the funders.

All authors had full access to all of the data (including statistical reports and tables) in the study and can take responsibility for the integrity of the data and the accuracy of the data analysis.

Data sharing: no additional data available.

Table 1: Statin use prior to (and including) index date of cancer and comparison cohorts

| Variable                                                            | Cancer Cohort |           | Comparison Cohort |           |
|---------------------------------------------------------------------|---------------|-----------|-------------------|-----------|
|                                                                     | N=1,731       |           | N=3,462           |           |
| <b>Statin type</b>                                                  | n             | %         | n                 | %         |
| Atorvastatin alone                                                  | 685           | 39.6      | 1,304             | 37.8      |
| Fluvastatin alone                                                   | 13            | 0.8       | 39                | 1.1       |
| Pravastatin alone                                                   | 257           | 14.8      | 525               | 15.2      |
| Rosuvastatin alone                                                  | 1             | 0.0       | 3                 | 0.0       |
| Simvastatin alone                                                   | 653           | 37.7      | 1,306             | 37.8      |
| Two or more statins                                                 | 122           | 7.0       | 285               | 8.2       |
| <b>DDD/day</b>                                                      | Median        | IQR       | Median            | IQR       |
| Atorvastatin                                                        | 1.00          | 1.0-2.00  | 1.00              | 1.00-2.00 |
| Fluvastatin                                                         | 0.67          | 0.33-0.67 | 0.67              | 0.33-0.67 |
| Pravastatin Sodium                                                  | 1.33          | 0.67-1.33 | 1.33              | 0.67-1.33 |
| Rosuvastatin                                                        | 2.00          | 1.00-2.00 | 2.00              | 1.00-2.31 |
| Simvastatin                                                         | 0.67          | 0.67-1.33 | 0.67              | 0.67-1.33 |
| <b>Time from first statin to index date (days)</b>                  | Median        | IQR       | Median            | IQR       |
|                                                                     | 611           | 336-901   | 616               | 339-903   |
| <b>Patients with breaks of <math>\geq 90</math> days in therapy</b> | n             | %         | n                 | %         |
|                                                                     | 310           | 17.9      | 888               | 25.6      |
| <b>Duration of breaks in therapy (days)</b>                         | Median        | IQR       | Median            | IQR       |
|                                                                     | 136           | 102-211   | 142               | 104-232   |

Table 2: Adjusted Cox-Proportional Hazard Regression analyses for association with statin discontinuation during follow-up

| Variable                        | Cases<br>N | Discontinued<br>n (%) | aHR*  | 95% CI    | p-value  |
|---------------------------------|------------|-----------------------|-------|-----------|----------|
| <b>Age (at 1 Jan 2005)</b>      |            |                       | 0.85† | 0.76-0.95 | 0.004    |
| ≤74 years                       | 247        | 35 (14.2)             |       |           |          |
| 75-79 years                     | 289        | 53 (18.3)             |       |           |          |
| 80-84 years                     | 832        | 121 (14.5)            |       |           |          |
| 85+ years                       | 363        | 81 (22.3)             |       |           |          |
| <b>Prior hospital admission</b> |            |                       | 1.01† | 0.99-1.03 | 0.16     |
| 0                               | 764        | 121 (15.8)            |       |           |          |
| 1-4                             | 833        | 148 (17.8)            |       |           |          |
| 5-9                             | 85         | 15 (17.6)             |       |           |          |
| 10+                             | 49         | 6 (12.2)              |       |           |          |
| <b>Comorbidity burden</b>       |            |                       | 0.99† | 0.96-1.03 | 0.36     |
| 0-3                             | 261        | 46 (17.6)             |       |           |          |
| 4-9                             | 120        | 19 (15.8)             |       |           |          |
| 10+                             | 1,350      | 225 (16.7)            |       |           |          |
| <b>Median DDD/day</b>           |            |                       | 1.14† | 0.99-1.30 | 0.06     |
| <b>Degree of Spread</b>         |            |                       |       |           | <0.001   |
| Localised                       | 789        | 106 (13.4)            | 1.00  | 1.00      | Referent |
| Regional                        | 275        | 54 (19.6)             | 1.73  | 1.28-2.35 | <0.001   |
| Distant                         | 120        | 30 (25.0)             | 3.90  | 2.72-5.59 | <0.001   |
| Unknown                         | 547        | 100 (18.3)            | 1.36  | 1.03-1.80 | 0.03     |
| <b>Cancer Topography</b>        |            |                       |       |           |          |
| Upper GI, Liver                 | 69         | 32 (46.4)             | 2.95  | 1.92-4.53 | <0.001   |
| Lung, Bronchus, Trachea         | 120        | 38 (31.7)             | 1.99  | 1.32-3.00 | 0.001    |
| Lymphoma                        | 73         | 19 (26.0)             | 1.24  | 0.71-2.16 | 0.46     |
| Other type                      | 207        | 53 (25.1)             | 1.28  | 0.87-1.89 | 0.20     |
| Colorectal                      | 300        | 70 (23.3)             | 1.00  | 1.00      | Referent |
| Bladder                         | 65         | 14 (21.5)             | 1.19  | 0.66-2.13 | 0.56     |
| Kidney                          | 38         | 8 (21.1)              | 0.87  | 0.41-1.81 | 0.70     |
| Breast                          | 102        | 21 (20.6)             | 0.98  | 0.60-1.60 | 0.93     |
| Head & Neck                     | 44         | 9(20.4)               | 1.01  | 0.50-2.03 | 0.98     |
| Leukaemia                       | 35         | 7 (20.0)              | 1.08  | 0.48-2.45 | 0.85     |
| Ill-defined, unspecified        | 42         | 8 (19.0)              | 0.51  | 0.24-1.09 | 0.08     |
| Prostate                        | 393        | 68 (17.3)             | 0.79  | 0.55-1.14 | 0.20     |
| Melanoma of the skin            | 243        | 30 (12.4)             | 0.58  | 0.37-0.91 | 0.02     |

\*Adjusted for all factors in the table. † aHR indicates ratio per decade, admission, comorbid illness and DDD respectively.

Figure 1: Statin discontinuation after index date as determined with Kaplein-Meier product limit estimates



1  
2  
3  
4  
5  
6  
7  
8  
9  
10  
11  
12  
13  
14  
15  
16  
17  
18  
19  
20  
21  
22  
23  
24  
25  
26  
27  
28  
29  
30  
31  
32  
33  
34  
35  
36  
37  
38  
39  
40  
41  
42  
43  
44  
45  
46  
47  
48  
49  
50  
51  
52  
53  
54  
55  
56  
57  
58  
59  
60

Figure 2: Scatter plot of time to last statin prescription against time to death from diagnosis date.

Shaded area indicates the period within 30days of death.

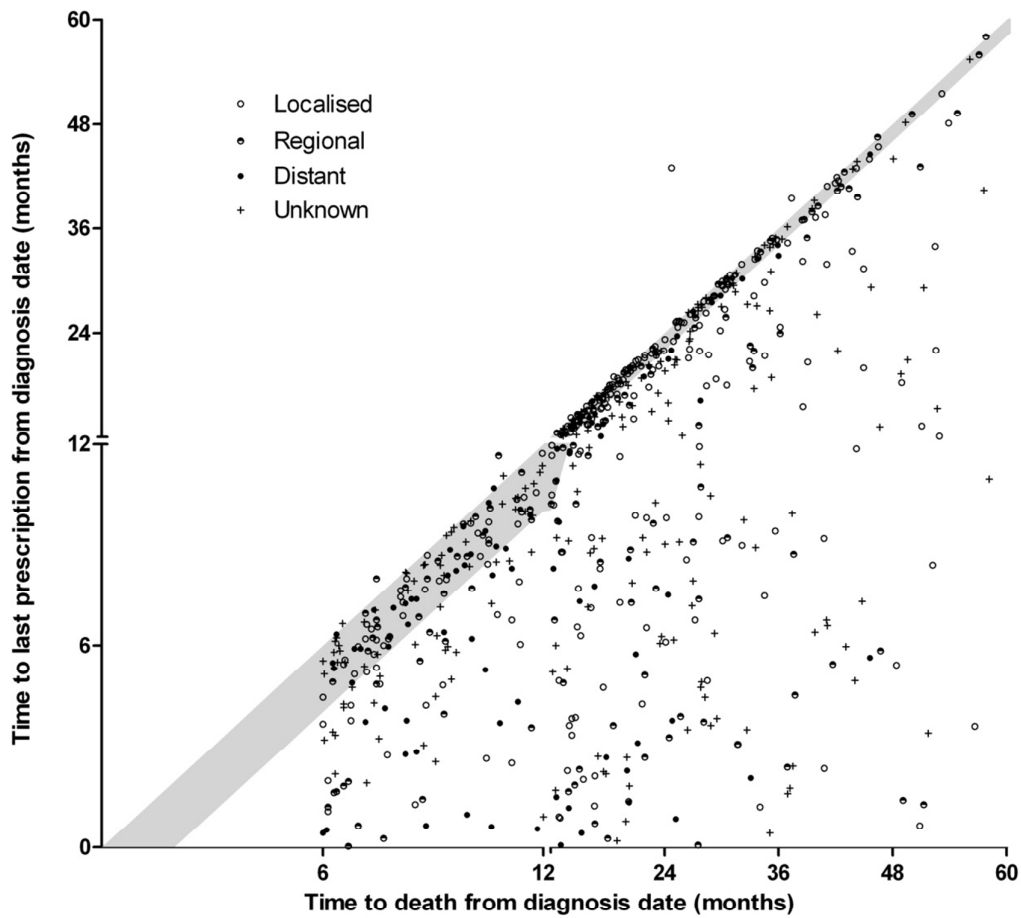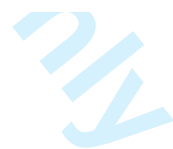



## References

1. Hall P, Lord S, El-Laboudi A, et al. Non-cancer medications for patients with incurable cancer: time to stop and think. *Br J Gen Pract*. 2010; doi:10.3399/brgp10X483887.
2. Tanvetyanon T, Choudhury A. Physician practice in the discontinuation of statins among patients with advanced lung cancer. *J Palliat Care*. 2006; **22**: 281-5.
3. Stevenson JP, Currow D, Abernathy A, et al. The broader implications of managing statins at the end of life (Comment). *J Palliat Care*. 2007; **23**: 188-9.
4. Riechelmann R, Krzyzanowska MK, Zimmermann C. Futile medication use in terminally ill cancer patients. *Support Care Cancer*. 2009; **17**: 745-8.
5. Fede A, Miranda M, Antonangelo D, et al. Use of unnecessary medications by patients with advanced cancer: cross-sectional survey. *Support Care Cancer*. 2010; DOI 10.1007/s00520-010-0947-1.
6. Silveira M, Segnini Kazanis A, Shevrin M. Statins in the last six months of life: A recognizable, life-limiting condition does not decrease their use. *J Palliat Med*. 2008; **11**: 685-93.
7. Vollrath A, Sinclair C, Hallenbeck J. Discontinuing cardiovascular medications at the end of life: Lipidlowering agents. *J Palliat Med*. 2005; **8**: 876-81.
8. Abernathy A, Aziz N, Basch E, et al. A strategy to advance the evidence base in palliative medicine: Formation of a palliative care research cooperative group. *J Palliat Med*. 2010; **13**: 1407-13.
9. Davis G. Discontinuing lipid-lowering agents. *J Palliat Med*. 2006; **9**: 619.
10. Amarenco P, Labreuche J, Lavalley P, et al. Statins in stroke prevention and carotid atherosclerosis: Systematic review and up-to-date meta-analysis. *Stroke*. 2002; **35**: 2902-9.
11. Sever P, Dahlof B, Poulter N, et al. Prevention of coronary and stroke events with atorvastatin in hypertensive patients who have average or lower-than-average cholesterol concentrations, in the Anglo-Scandinavian Cardiac Outcomes Trial - Lipid Lowering Arm (ASCOT-LLA): A multicentre randomised controlled trial. *Lancet*. 2003; **361**: 1149-58.
12. Shepherd J, Blauw GJ, Murphy MB, et al. Pravastatin in elderly individuals at risk of vascular disease (PROSPER): a randomised controlled trial. *Lancet*. 2002; **360**: 1623-30.
13. Downs JR, Clearfield M, Weis S, et al. Primary prevention of acute coronary events with lovastatin in men and women with average cholesterol levels: Results of AFCAPS/TexCAPS. *Arch Intern Med*. 1998; **279**: 1615-22.
14. Ballantyne C, Corsini A, Davidson M, et al. Risk for myopathy with statin therapy in high-risk patients. *Arch Intern Med*. 2003; **163**: 553-64.
15. Corsini A, Bellosta S, Baetta R, et al. New insights into the pharmacodynamic and pharmacokinetic properties of statins. *Pharmacol Ther*. 1999; **84**: 413-28.
16. Newman C, Palmer G, Silbershatz H, et al. Safety of atorvastatin derived from analysis of 44 completed trials in 9,416 patients. *Am J Cardiol*. 2003; **92**: 670-6.
17. Department of Veterans' Affairs (DVA). Annual Report 2006-2007. Canberra: DVA, ; 2007.
18. Department of Veterans' Affairs Rehabilitation RaDG. Treatment Population Statistics. Quarterly Report September 2007 Canberra: Department of Veretans' Affairs,; 2007.
19. Percy C, Van Holten V, Muir C, (eds). ICD-O International Classification of Diseases for Oncology, 3rd edition. . Geneva: WHO; 1990.
20. WHO Collaborating Centre for Drug Statistics Methodology. ATC/DDD Index: C10AA HMG CoA reductase inhibitors. 2011 [cited 23rd March 2011]; Available from: [http://www.whocc.no/atc\\_ddd\\_index/?code=C10AA](http://www.whocc.no/atc_ddd_index/?code=C10AA)
21. Lu CY, Barratt J, Vitry A, et al. Charlson and Rx-risk comorbidity indices were predictive of mortality in the Australian health care setting. *J Clin Epidemiol*. 2011; **64**: 223-8.
22. Vitry A, Wong SA, Roughead EE, et al. Validity of medication-based co-morbidity indices in the Australian elderly population. *Aust NZ J Public Health*. 2009; **33**: 126-30.

1  
2  
3  
4  
5  
6  
7  
8  
9  
10  
11  
12  
13  
14  
15  
16  
17  
18  
19  
20  
21  
22  
23  
24  
25  
26  
27  
28  
29  
30  
31  
32  
33  
34  
35  
36  
37  
38  
39  
40  
41  
42  
43  
44  
45  
46  
47  
48  
49  
50  
51  
52  
53  
54  
55  
56  
57  
58  
59  
60

23. Maggiore RJ, Gross CP, Hurria A. Polypharmacy in older adults with cancer. *The Oncologist*. 2010; **15**: 507-22.

For peer review only
